## THE EFFECTS OF CARBON DIOXIDE ON THE CEREBRAL CIRCULATION

LOUIS SOKOLOFF, M.D.

CARBON dioxide has long been suspected of a special role in the regulation of the cerebral circulation. In 1890, Roy and Sherrington<sup>50</sup> in a discussion of the "regulation of the blood supply of the brain" stated, "... the chemical products of cerebral metabolism contained in the lymph which bathes the walls of the arterioles of the brain can cause variations of the calibre of the cerebral vessels . . . in this re-action the brain possesses an intrinsic mechanism by which its vascular supply can be varied locally in correspondence with local variations of functional activity." Almost all subsequent work has tended to confirm the remarkable insight of this hypothesis, and because of its potent tonic action on the cerebral vessels, CO<sub>2</sub> has come to be considered the metabolic product chiefly responsible for this regulation.<sup>16, 19, 29, 54, 61, 62, 70</sup>

### EFFECTS OF CARBON DIOXIDE ON CEREBRAL CIRCULATION IN NORMAL MAN

It is generally agreed that CO<sub>2</sub> exerts more powerful effects on the cerebral circulation than any other means of physiological or pharmacological significance.<sup>16, 51, 59, 58, 61, 70</sup> The quantitative effects of CO<sub>2</sub> on the cerebral circulation are best described by the studies in man using the nitrous oxide technique<sup>55</sup> and its modifications.<sup>40, 41, 54</sup> The results of some of these studies<sup>15, 11, 25, 36, 47, 48</sup> are summarized in table 1.

*Effects of Increased Arterial P<sub>CO<sub>2</sub></sub>.* The original observations by Kety and Schmidt<sup>56</sup> of an approximately 75 per cent rise in cerebral blood flow and a comparable fall in cerebral vascular resistance during the inhalation of 5 to 7 per cent CO<sub>2</sub> in room air have been amply confirmed in normal human subjects both young<sup>47</sup> and elderly<sup>44</sup> (table 1). Inspired air concentrations of 5 per cent CO<sub>2</sub> raises cerebral blood flow approximately 50 per

cent<sup>56, 47</sup>; 7 per cent CO<sub>2</sub>, the concentration with approximately maximal effects on pulmonary ventilation and arterial blood pressure,<sup>1</sup> more than doubles cerebral blood flow.<sup>56, 44, 6</sup> Whether 7 per cent CO<sub>2</sub> also produces maximal cerebral circulatory changes is uncertain, for 1.0 reliable comparative quantitative studies have been carried out in man with higher concentrations. Gibbs and co-workers<sup>21</sup> found that 10 per cent CO<sub>2</sub> also doubles cerebral blood flow, but the method employed in these studies was the dye dilution technique with unilateral internal jugular venous sampling, a method subject to serious error.<sup>70</sup>

Recent studies by Patterson and his associates<sup>48</sup> indicate that the cerebrovascular response to increased carbon dioxide is a threshold phenomenon. In normal human subjects the inhalation of 2.5 per cent CO<sub>2</sub> in room air fails to alter cerebral blood flow, but 3.5 per cent CO<sub>2</sub> produces a significant increase of about 10 per cent.<sup>48</sup> At this concentration pressor effects of carbon dioxide are absent, and the increased blood flow results only from a dilatation of the cerebral vessels. The threshold in man for cerebral vascular dilatation lies, therefore, between these two inspired air concentrations and has been estimated<sup>48</sup> to correspond to an approximately 4.5 mm. of mercury change in arterial P<sub>CO<sub>2</sub></sub>. This threshold is somewhat higher than the one observed by Noell and Schneider<sup>46</sup> in anesthetized dogs; in this preparation a 2 mm. of mercury change in arterial P<sub>CO<sub>2</sub></sub> was sufficient to alter the arteriovenous oxygen difference by an amount indicative of an 8 to 10 per cent change in cerebral blood flow.

*Effects of Decreased Arterial P<sub>CO<sub>2</sub></sub>.* The carbon dioxide normally present in the blood exerts a tonic vasodilator action on the cerebral blood vessels, and a fall in arterial P<sub>CO<sub>2</sub></sub> normally results in cerebral vasoconstriction and reduced cerebral blood flow (table 1). In the studies of Kety and Schmidt,<sup>56</sup> for example, a reduction in arterial P<sub>CO<sub>2</sub></sub> from 45 to 26 mm. of mercury by means of active

Dr. Sokoloff is Chief, Section on Cerebral Metabolism, Laboratory of Clinical Science, National Institute of Mental Health, National Institutes of Health, Bethesda, Maryland.

TABLE 1  
EFFECTS OF ALTERED ARTERIAL BLOOD CO<sub>2</sub> TENSION ON CEREBRAL CIRCULATION IN MAN

| Inspired Air                                | Clinical State                    | Cerebral Blood Flow (ml./100 Gm./minute) |     | Cerebral Vascular Resistance (mm. Hg ml./100 Gm./minute) |      | Mean Arterial Blood Pressure (mm. Hg) |      | Arterial Blood CO <sub>2</sub> Tension (mm. Hg) |     | Arterial Blood pH |       | References |
|---------------------------------------------|-----------------------------------|------------------------------------------|-----|----------------------------------------------------------|------|---------------------------------------|------|-------------------------------------------------|-----|-------------------|-------|------------|
|                                             |                                   | C                                        | E   | C                                                        | E    | C                                     | E    | C                                               | E   | C                 | E     |            |
| 2.5% CO <sub>2</sub> in room air            | Normals and convalescent patients | 51                                       | 52  | 1.7                                                      | 1.8  | 87                                    | 90   | 48                                              | 43  | 7.41              | 7.36  | 48         |
| 3.5% CO <sub>2</sub> in room air            | Normals and convalescent patients | 52                                       | 57* | 2.0                                                      | 1.8* | 98                                    | 95   | 39                                              | 45* | 7.40              | 7.35* | 48         |
| 5-7% CO <sub>2</sub> in room air            | Young normals                     | 53                                       | 93* | 1.6                                                      | 1.1* | 82                                    | 92*  | 43                                              | 52* | 7.38              | 7.33* | 36         |
| 5% CO <sub>2</sub> in room air              | Young normals                     | 53                                       | 71* | 1.8                                                      | 1.2* | 91                                    | 95*  | 43                                              | 50* | 7.36              | 7.30* | 47         |
| 5% CO <sub>2</sub> in room air              | Normotensive elderly              | 55                                       | 56* | 2.9                                                      | 2.2* | 93                                    | 115  |                                                 |     |                   |       | 11         |
| 5% CO <sub>2</sub> in room air              | Essential hypertension            | 52                                       | 86* | 2.6                                                      | 1.7* | 136                                   | 150* | 40                                              | 48* | 7.41              | 7.35* | 47         |
| 5% CO <sub>2</sub> in room air              | Hypertensive elderly              | 39                                       | 47* | 3.6                                                      | 3.2  | 132                                   | 133  |                                                 |     |                   |       | 11         |
| 5% CO <sub>2</sub> in room air              | Arteriosclerosis                  | 47                                       | 55* | 2.1                                                      | 1.9  | 91                                    | 98   | 46                                              | 53* | 7.34              | 7.30* | 47         |
| 5% CO <sub>2</sub> in room air              | Hypertensive arteriosclerosis     | 36                                       | 49* | 3.7                                                      | 3.0* | 132                                   | 139* | 58                                              | 48* | 7.41              | 7.37* | 47         |
| 5% CO <sub>2</sub> in room air              | Cerebral vascular disease         | 35                                       | 51* | 3.5                                                      | 2.8* | 112                                   | 130* |                                                 |     |                   |       | 13         |
| 5% CO <sub>2</sub> in 85-90% O <sub>2</sub> | Essential hypertension            | 57                                       | 66  | 3.0                                                      | 2.7  | 160                                   | 161  | 40                                              | 45* |                   |       | 23         |
| Hyperventilation in room air                | Young normals                     | 52                                       | 31* | 1.7                                                      | 2.9* | 90                                    | 98*  | 45                                              | 26* | 7.38              | 7.51* | 36         |
|                                             | Normotensive elderly              | 54                                       | 39* | 1.9                                                      | 2.6* | 100                                   | 90   |                                                 |     |                   |       | 14         |
|                                             | Hypertensive elderly              | 45                                       | 32* | 3.1                                                      | 3.8* | 128                                   | 116  |                                                 |     |                   |       | 14         |

\*  $P < 0.05$ .

C = Control. E = Experimental.

or passive hyperventilation was associated with a decline in cerebral blood flow to about 65 per cent of the control level and an even greater rise in cerebral vascular resistance. The cerebral blood flow at this low level of arterial  $P_{CO_2}$  was close to the critical value below which syncope occurs,<sup>15</sup> and, indeed, mental signs and symptoms of cerebral ischemia were present. As discussed below, there is evidence to indicate that there are limits below which increasing hypocapnia can no longer decrease the cerebral blood flow<sup>15, 16</sup>; ultimately the cerebral vasodilator action of the low tissue oxygen tension caused by the cerebral ischemia becomes so great as to block the effects of any further decrease in  $P_{CO_2}$ .

**Time Course of Carbon Dioxide Effects.** The studies cited above on the effects of altered arterial  $P_{CO_2}$  on cerebral blood flow were all performed during the steady state following several minutes of equilibration with the experimental respiratory conditions. By means of the Kr<sup>29</sup> method, which permits continuous minute-by-minute measurement of cerebral blood flow in man, Lewis and his co-workers<sup>44</sup> have been able to follow the cerebral circulatory changes occurring in the first few minutes immediately following the onset of either CO<sub>2</sub> inhalation or hyperventilation. Their results are graphically illustrated in figure 1. It is

seen that 7 per cent CO<sub>2</sub> produces slight but detectable changes in cerebral blood flow within the first minute following the onset of its inhalation; cerebral blood flow then rises rapidly and continues to rise even after 4 minutes of inhalation. Similarly, hyperventilation in room air at a rate of 30 liters per minute, or about three times the control level, is only slightly less rapid in producing an effect. A reduction in cerebral blood flow is first detected after about 1.5 minutes of such hyperventilation, but, thereafter, the blood flow declines rapidly, almost linearly with time, and is still falling after 6 minutes of hyperventilation. Since most of the latency in the above responses can be attributed to the approximately one minute resolution time of the method, it can be concluded that the reactivity of the cerebral circulation to altered arterial  $P_{CO_2}$  is prompt, almost immediate; the delay in achieving a steady state reflects the time required for the alveolar and arterial  $P_{CO_2}$  to reach their equilibrium value.

#### EFFECTS OF CARBON DIOXIDE ON LOCAL CEREBRAL BLOOD FLOW

Blood flow differs considerably in the various component structures of the brain,<sup>24</sup> and local differences in physiological and pharmacological responses are often observed.<sup>17</sup> Methods for the measurement of local human cere-

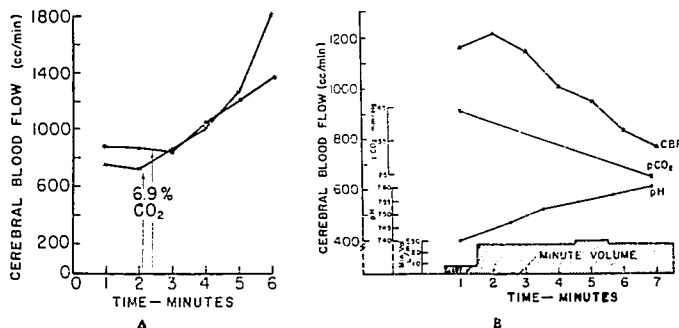

FIG. 1. Time course of changes in cerebral blood flow in response to alterations in arterial  $P_{CO_2}$ . A, two studies during the inhalation of 7 per cent  $CO_2$ ; B, during hyperventilation of room air at a rate of approximately 30 liters per minute [from Lewis, *et al.*<sup>14</sup>].

bral blood flow are not yet available, but Kety and his associates<sup>17, 22, 28</sup> have recently developed a technique for the simultaneous quantitative determination of blood flow in, at least, 28 structures of the cat brain. Hansen and his co-workers<sup>17, 24</sup> have studied the effects of  $CO_2$  inhalation in unanesthetized cats by means of this technique. Although there were quantitative differences in response in the various areas, all structures studied revealed increases in blood flow. The increases were somewhat greater in gray matter than in white matter. For example, the average responses to 5 per cent  $CO_2$  were +67 per cent in gray matter and +54 per cent in white matter; 10 per cent  $CO_2$  caused considerably greater increases in both types of tissues, particularly the gray matter.

#### EFFECTS OF CARBON DIOXIDE ON CEREBRAL METABOLIC RATE

Carbon dioxide is known to alter central nervous system functions.<sup>19, 20, 22, 43</sup> The prolonged breathing of 10 per cent or even lower concentrations of  $CO_2$  can depress the central nervous system and may result in unconsciousness. Higher concentrations of  $CO_2$  may cause convulsions. Measurements of cerebral metabolic rate during  $CO_2$  induced unconsciousness or convulsive seizures have not been reported, but it is likely that it would be found to be altered in these conditions. Cerebral oxygen consumption is reduced in all pathological

states of unconsciousness thus far studied,<sup>21, 29</sup> and increased cerebral oxygen consumption has been observed in convulsions induced by electrical stimulation and a variety of drugs.<sup>8-10, 29, 41</sup> In the absence of these gross functional disturbances, changes in the  $P_{CO_2}$  of the blood and cerebral tissues still have profound effects on the EEG,<sup>19, 20, 43</sup> but they do not then appear to affect cerebral oxygen consumption. In numerous studies in man on the effects of the inhalation of 2.5 to 7 per cent  $CO_2$ ,<sup>12, 14, 23, 36, 47, 48</sup> no significant changes in cerebral metabolic rate have been observed. Gibbs and co-workers<sup>21</sup> have reported that 10 per cent  $CO_2$  reduces human cerebral oxygen consumption, but the method employed by them was the dye dilution technique with unilateral internal jugular venous sampling, and this method has been found to have doubtful reliability.<sup>20</sup> Kety and Schmidt,<sup>24</sup> employing the nitrous oxide method, found increases in cerebral oxygen consumption during active hyperventilation, but the significance of this finding is uncertain since the same degree of hypocapnia produced by passive hyperventilation had no such effect.<sup>24</sup> Also, others have failed to observe any effects on cerebral metabolic rate during comparable degrees of voluntary hyperventilation.<sup>14, 21</sup>

#### MECHANISM OF ACTION

Changes in arterial blood pressure frequently accompany the effects of altered arterial  $P_{CO_2}$  on the cerebral circulation (table 1), but these

changes are often absent or in the opposite direction and never of sufficient magnitude to explain the effects. Carbon dioxide alters cerebral blood flow almost entirely by its action on the cerebrovascular resistance (table 1). Of the various factors which contribute to this function, only two are appreciably influenced by carbon dioxide. One, the intracranial pressure, is raised by carbon dioxide,<sup>4, 69</sup> a change which would increase rather than lower cerebrovascular resistance. The other, the diameter of the cerebral vessels, must, therefore, be decreased, and indeed active dilatation of pial vessels by CO<sub>2</sub> and constriction by hyperventilation have been directly visualized.<sup>60, 71</sup> The rise in intracranial pressure caused by CO<sub>2</sub> inhalation is secondary to the effects of the cerebral vasodilatation, for example, increases in the blood content,<sup>68</sup> volume,<sup>65, 69</sup> and blood flow<sup>54, 52</sup> of the brain.

Neurogenic mechanisms do not appear to be involved in the cerebral vasodilator response to carbon dioxide. Spinal transection, decerebration, section of the sixth, seventh, and eighth cranial nerves, and cervical sympathectomy, operations which interrupt all known vasomotor pathways to the cerebral vessels, do not prevent the rise in cerebral blood flow caused by CO<sub>2</sub> administration.<sup>70</sup> Local vasodilator reflexes of the axon type would not be interrupted by these procedures, but there is no evidence that carbon dioxide is capable of activating axon reflexes in any vascular bed. Furthermore, CO<sub>2</sub> administration causes simultaneously with the increased cerebral blood flow a depression of the circulation in the extracranial<sup>58</sup> and peripheral tissues;<sup>5, 25, 29, 42, 43</sup> a reduction in blood P<sub>CO<sub>2</sub></sub> by hyperventilation does the opposite.<sup>5, 29, 42, 43</sup> Following interruption of their vasomotor innervations, however, these other vascular beds respond to CO<sub>2</sub> exactly like the cerebral circulation.<sup>49, 51, 63</sup> The fact that the cerebral vessels normally respond to CO<sub>2</sub> like other vascular beds do only after denervation is further evidence that the CO<sub>2</sub> effect on the cerebral vessels is not mediated by nervous mechanisms but is a direct action on the smooth muscle of the vessel walls. Indeed, isolated strips of carotid artery have been observed to dilate when CO<sub>2</sub> is dissolved in the Ringer solution in which they are immersed.<sup>7</sup>

The question is frequently raised whether the action of CO<sub>2</sub> on the cerebral circulation might not be explained by its effect on pH, particularly since acids have been reported to dilate<sup>18, 19, 55, 71</sup> and alkalis to constrict<sup>18, 42, 57, 71</sup> the cerebral vessels. The effects of pH are, however, weak and inconstant compared to those of carbon dioxide. Furthermore, there have been observations of decreases in cerebral blood flow caused by acids<sup>55</sup> and increases caused by alkalis.<sup>5, 55</sup> Such contrary effects might be expected in partially compensated metabolic acidosis or alkalosis in which, if the actions of CO<sub>2</sub> and pH are truly independent, their effects on the cerebral circulation conflict. There is then acidosis with decreased blood P<sub>CO<sub>2</sub></sub> or alkalosis with increased P<sub>CO<sub>2</sub></sub>, and depending on the degree of acidosis or alkalosis and the extent of compensation, either pH or P<sub>CO<sub>2</sub></sub> may dominate. It is only in respiratory acidosis and alkalosis that the effects of the changes in pH and P<sub>CO<sub>2</sub></sub> on the cerebral circulation augment each other. Schieve and Wilson<sup>55</sup> have studied carefully the effects of experimental metabolic acidosis and alkalosis on the cerebral circulation in man. Their results clearly dissociate the actions of CO<sub>2</sub> from those of pH, more or less prove that the CO<sub>2</sub> effects are not indirectly mediated through changes in pH, and demonstrate that within blood pH ranges not two distant from normal, P<sub>CO<sub>2</sub></sub> is a more potent regulator of cerebrovascular tone than pH.

#### THE ROLE OF CARBON DIOXIDE IN THE NORMAL REGULATION OF THE CEREBRAL CIRCULATION

Since CO<sub>2</sub> is constantly being produced by the metabolism of the brain and removed by its circulation, the changes in cerebral blood flow induced by altered blood P<sub>CO<sub>2</sub></sub> are in a direction tending to maintain a constancy of the tissue P<sub>CO<sub>2</sub></sub>. Thus, increased arterial P<sub>CO<sub>2</sub></sub> results in an increased blood flow which tends to remove the CO<sub>2</sub> produced by metabolism more rapidly from the tissues; reduced arterial P<sub>CO<sub>2</sub></sub> does the opposite. The efficacy of this homeostatic mechanism is evident in the changes observed in the P<sub>CO<sub>2</sub></sub> of the cerebral venous blood, which reflects more closely than arterial blood the conditions in the cerebral tissues.<sup>5, 19, 26, 42</sup> Alterations in arterial P<sub>CO<sub>2</sub></sub>, produced either by CO<sub>2</sub> inhalation or hyperventilation, are

greatly damped and only partially reflected in the  $P_{CO_2}$  changes in the cerebral venous blood<sup>19, 26, 42</sup> because of the compensatory effect of the concomitant changes in cerebral blood flow. A mechanism which regulates blood flow so as to maintain homeostasis in the tissues in regard to  $CO_2$  would, by virtue of the relationship between  $CO_2$  production and metabolic rate, serve also to adjust the blood flow to the metabolic demands and functional activity of the tissue. The assumption is made, of course, that  $CO_2$  in the surrounding tissues is just as effective in dilating cerebral vessels as the  $CO_2$  in the blood. It was just such a chemical mechanism mediated by the action of a metabolite which Roy and Sherrington<sup>50</sup> first proposed for the regulation of cerebral blood flow. Because its action under normal circumstances is so much more potent than that of any other chemical agent,<sup>19, 41, 70</sup> carbon dioxide has gained recognition as the metabolite most prominently involved.<sup>16, 19, 29, 38, 61, 62, 70</sup> Indeed, in the absence of any clear demonstration of significant neurogenic control of the cerebral vasculature,<sup>21, 29, 61, 62, 70</sup> it is this chemical mechanism, the modulation of the continuous action of  $CO_2$  on the cerebral vessels, which is currently believed to be the chief means for the normal regulation of the cerebral circulation.<sup>16, 19, 29, 38, 61, 62, 70</sup> There may be conditions in which the effects of  $CO_2$  may be superseded by the action of other chemical factors, such as low oxygen tension in anoxia<sup>19, 29, 36</sup> or pH in metabolic acidosis,<sup>32</sup> but under normal circumstances the influence of  $CO_2$  appears to be predominant.

#### EFFECTS OF CARBON DIOXIDE ON CEREBRAL CIRCULATION IN VARIOUS PHYSIOLOGICAL AND PATHOLOGICAL STATES

**Hypoxemia.** There have been numerous studies on the effects on the cerebral circulation of simultaneous alterations in both the  $CO_2$  and  $O_2$  tensions of the blood.<sup>19, 29, 37, 38, 42, 16</sup> Although the threshold of the cerebral circulatory response to increased  $CO_2$  may be reduced when it is combined with a low oxygen content of the inspired air, there is evidence that a cerebral blood flow already increased by hypoxemia is less altered by changes in arterial  $P_{CO_2}$  than normally. Lennox and Gibbs<sup>12</sup> have found that the combined effects

of high  $CO_2$  and low  $O_2$  contents in the inspired air are not entirely additive; they are less than the sum of their individual action and, in fact, no greater than that of the increased  $CO_2$  alone. Similarly, a given reduction in arterial  $P_{CO_2}$  by means of hyperventilation causes a lesser reduction in cerebral blood flow during hypoxemia than under normal conditions.<sup>19, 42</sup> The cerebral vasodilatation already produced by hypoxemia<sup>6, 29, 36, 42, 61, 70, 71</sup> appears, therefore, to represent a contributory part of that which would result from the raised  $P_{CO_2}$  alone and tends to combat the vasoconstrictor effect of a reduction in  $P_{CO_2}$ . One might expect a point of lowered oxygen tension at which the effects of  $CO_2$  are negligible. Indeed, Noell and Schneider<sup>35</sup> have found in dogs that the lower limit of cerebral blood flow resulting from hypocapnia occurs when the cerebral venous  $P_{CO_2}$  falls to about 19 mm. of mercury; at this point cerebral blood flow cannot be further reduced by additional lowering of arterial  $P_{CO_2}$  because of the vasodilator effects of the low tissue  $O_2$  tension. Evidence for a similar phenomenon has been obtained in man.<sup>19</sup>

The relative importance of blood  $P_{CO_2}$  and  $P_{O_2}$  in regulating the cerebral blood flow appears to vary with the blood tensions of both gases. Carbon dioxide becomes progressively less effective as the blood  $P_{CO_2}$  deviates more and more from the normal level.<sup>16</sup> On the other hand, at elevated, normal, or even slightly reduced levels of blood  $P_{O_2}$ , oxygen has relatively negligible effects compared to those of  $CO_2$ . Courtice<sup>6</sup> has found in chloralosed cats that the breathing of low  $O_2$  mixtures does not increase cerebral blood flow until the concentration in the inspired air is reduced below 15 per cent. With increasing hypoxemia, the effectiveness of reduced oxygen tension increases progressively,<sup>6</sup> and the relative importance of  $O_2$  and  $CO_2$  undergoes a gradual reversal. For example, the breathing of 10 per cent  $O_2$  results in considerable increases in cerebral blood flow despite the hypocapnia resulting from the associated hyperventilation.<sup>36</sup> Ultimately, at a critical level of hypoxemia,<sup>16</sup> the influence of  $O_2$  is paramount and that of  $CO_2$  negligible. In the transitional zone between mild and extreme hypoxemia, cerebral blood flow is adjusted by

the blood and brain tensions of both gases, and its level is determined more or less by their net effect. In general, the evidence supports the view expressed by Gibbs and his co-workers<sup>19, 21</sup> that cerebral blood flow is normally regulated chiefly by carbon dioxide to maintain homeostasis as regards brain tissue  $P_{CO_2}$ ; a similar homeostatic mechanism for oxygen exists, but it is primarily an emergency one that becomes important only when adequate oxygenation of the brain is threatened.

**Increased Blood  $P_{O_2}$ .** The action of  $CO_2$  on the cerebral circulation is altered very little, if at all, by elevated blood  $P_{O_2}$ .<sup>12</sup> This is probably because of the relatively weak cerebral vasoconstrictor effect of increased oxygen.<sup>25, 26, 35, 42, 65</sup> The combination of high  $O_2$  and high  $CO_2$  concentrations in inspired air so frequently employed clinically is, therefore, associated with almost the same degree of augmentation of the cerebral blood flow as obtained with increased  $CO_2$  alone.

**Acidosis and Alkalosis.** Acids dilate cerebral vessels,<sup>18, 19, 55, 71</sup> and cerebral vessels already dilated in acidosis might be expected, as in hypoxemia, to be less responsive to change in the  $P_{CO_2}$  of the blood. With severe enough acidosis, the vasodilator effect may be sufficient to supersede the vasoconstrictor effects of even pronounced reductions in the arterial  $P_{CO_2}$ .<sup>33</sup> Conversely, in metabolic acidosis a compensatory reduction in blood  $P_{CO_2}$  may be sufficient to overcome the effects of low pH and cause cerebral vasoconstriction; in such circumstances the administration of 5 per cent  $CO_2$  in the inspired air has been found to be as effective as normally in increasing the cerebral blood flow.<sup>55</sup> Normal cerebral circulatory responses to  $CO_2$  have also been observed in metabolic alkalosis induced by bicarbonate infusions.<sup>55</sup>

**Anesthesia.** Except for thiopental, there are almost no reliable data available on the effects of general anesthetics on the cerebral circulation.<sup>61</sup> In thiopental anesthesia<sup>56, 69</sup> there appears to be a slight but significant decrease in the responsiveness of the cerebral circulation to the administration of  $CO_2$  in the inspired air. However, arterial  $P_{CO_2}$  is frequently already elevated during deep thiopental anesthesia because of the respiratory depression,<sup>67, 69</sup> and the reduced reactivity to additional  $CO_2$  may reflect only the decreasing effectiveness of

the gas as its blood tension deviates further from its normal physiological levels.<sup>16</sup>

The frequent use of passive hyperventilation during surgical anesthesia raises a relevant question about the effects of hypocapnia on the cerebral circulation in that condition. Although the data are sparse, there is evidence to suggest that most volatile general anesthetics dilate cerebral vessels.<sup>61</sup> In the case of diethyl ether, the effect is almost certain and probably direct;<sup>61, 70</sup> as regards most other anesthetics, the evidence is inconclusive, and the cerebral vasodilatation may be only a secondary effect of a respiratory depression produced by the drug.<sup>61</sup> In the anesthetized state achieved by anesthetic agents which themselves dilate the cerebral vessels, it is likely that this vasodilator action would tend to combat the vasoconstrictor effects of low  $P_{CO_2}$  and reduce the cerebral circulatory response to hypocapnia. Furthermore, the profound reduction in cerebral metabolic rate during anesthesia<sup>57, 58, 67, 69</sup> probably allows the brain to withstand lower levels of blood flow without damage than under normal circumstances. There is an additional factor which must be considered, however. Carbon dioxide itself has tonic effects on the cerebral tissues, as manifested, for example, by its actions on the functional activity of the medullary centers and the electrical activity of the cortex;<sup>19, 26</sup> it is not inconceivable that prolonged reductions in  $P_{CO_2}$  may have direct deleterious effects on the cerebral tissues.

**Cerebrovascular Disease.** Studies on the effects of altered arterial  $CO_2$  tensions on the cerebral circulation of elderly subjects and patients with vascular disease are summarized in table 1. The data indicate that the responses of the cerebral circulation in these patients are, at least, qualitatively like those in normal young subjects, but there has been some disagreement concerning the quantitative aspects of these responses.<sup>10, 14, 23, 39, 41, 47, 53, 56, 61</sup> There have been reports that the effects of  $CO_2$  inhalation on cerebrovascular resistance and cerebral blood flow are less in patients with vascular disease.<sup>10, 14, 23, 47, 56</sup> It has, in fact, been suggested that the cerebrovascular response to  $CO_2$  be employed clinically to evaluate the relative proportions of functional vasoconstriction and fixed organic narrowing of the cerebral vessels<sup>47</sup> or to distinguish between senile

dementia arising from primary parenchymatous brain degeneration or from the effects of cerebrovascular disease.<sup>56</sup> Others, however, have failed to observe in these conditions any noteworthy decrease in the cerebral vascular reactivity to changes in blood  $P_{CO_2}$  in either direction.<sup>14, 29, 41, 57</sup> From a recent review of the literature, Lassen<sup>58</sup> has concluded that cerebrovascular disease may lead to absolute decreases in the responses of the cerebral circulation to  $CO_2$ , but because of the high cerebral vascular resistance and low cerebral blood flow normally present in these patients, the changes elicited by  $CO_2$  are percentage-wise equal to those in normal subjects.

#### APPLICATIONS OF THE CEREBRAL CIRCULATORY EFFECTS OF CARBON DIOXIDE

*Recovery from Anesthesia.* Carbon dioxide is frequently used postoperatively to hasten recovery from general anesthesia. It not only stimulates the respiratory elimination of volatile anesthetics, but also clears the anesthetic agent from the tissues of the central nervous system more rapidly as a result of the accelerated blood flow through them.

*Protection Against Deleterious Effects of Hypoxemia on Central Nervous System Functions.* Gibbs and his associates<sup>29</sup> found the addition of 5 per cent  $CO_2$  to the inspired air to be effective in counteracting the deleterious effects of low oxygen on intellectual functions, electroencephalographic tracings, and cerebral oxygen tension. In their studies, the breathing of 6 per cent  $O_2$  in nitrogen was normally accompanied within a few minutes by mental confusion or unconsciousness, a shift to slow, high voltage waves in the electroencephalogram, and a marked fall in the  $O_2$  saturation of the cerebral venous blood. The addition of 5 per cent  $CO_2$  to the inspired air restored the mental functions and the electroencephalographic tracings to normal and improved the cerebral venous  $O_2$  saturation by an amount equivalent to that achieved by raising the  $O_2$  concentration in the inspired air 2 volumes per cent. Gibbs and his co-workers<sup>29</sup> suggest that  $CO_2$  is beneficial when the inspired air is low in oxygen because of two major effects: (1) improvement in oxygenation of the brain resulting from stimulation of pulmonary ventilation, redistribution of the cardiac output in

favor of the brain because of cerebral vasodilatation and peripheral vasoconstriction, and a shift in the hemoglobin dissociation curve in the direction favoring unloading of  $O_2$  in the tissues; (2) the maintenance of a near optimal brain tissue  $P_{CO_2}$ , so essential to normal cerebral functions, despite the hyperventilation associated with the anoxemia.

When anoxemia is complicated by  $CO_2$  retention, as, for example, during asphyxia or enforced rebreathing, the use of  $CO_2$  is probably contraindicated. In such circumstances, the cerebral vessels are already dilated by the combination of the altered gas tensions, and the brain  $P_{CO_2}$  is elevated. The addition of  $CO_2$  to the inspired air would then have relatively little further beneficial effect on cerebral blood flow but might raise the brain tissue  $CO_2$  to dangerously high and depressant levels. On the other hand, when cerebral anoxia is caused by ischemia of the brain, as, for example, during circulatory collapse or secondary shock,  $CO_2$  may be beneficial. In these conditions also, the brain tissue  $P_{CO_2}$  may be elevated, but only because cerebral blood flow is inadequate. By dilating cerebral vessels, constricting peripheral vessels,<sup>7, 28, 29, 42, 43, 55, 61</sup> and leaving the coronary vessels unchanged,<sup>42</sup>  $CO_2$  redistributes the cardiac output to favor the brain at the expense of less vital tissues. It may also combat the arterial hypocapnia resulting from hyperventilation not infrequently seen in secondary shock, and which, when it occurs, further jeopardizes the circulation to the brain. For example, in experimental hemorrhagic shock in man, Stone and his associates<sup>64</sup> found a low cerebral blood flow, attributable not only to the hypotension, but also to a moderate hypocapnia secondary to a hyperventilation of unknown origin. Mental functions were also impaired. The administration of morphine depressed the respiration, restored the arterial  $P_{CO_2}$ , and also the cerebral blood flow toward normal, and caused dramatic improvement in the mental state. The beneficial effect of morphine was attributed chiefly to its action in raising arterial  $P_{CO_2}$ . It would be of interest to know if the administration of  $CO_2$  alone might have had a similar effect.

*Resistance to Positive G.* Carbon dioxide has been reported to increase the tolerance to positive radial acceleration<sup>1, 2, 66</sup> and delay

"blackout." Its beneficial effect is probably related to its peripheral vasoconstrictor and cerebral vasodilator actions, thus reducing peripheral pooling and distribution of blood and aiding in the maintenance of the cerebral circulation under that stress.

# SUMMARY

Carbon dioxide occupies a similar role in the regulation of the cerebral circulation as in the control of the respiration. Its vasodilator action on the cerebral circulation is more potent than that of any chemical agent or physiological mechanism yet uncovered. It is tonically active, and changes in the  $P_{rO_2}$  of the blood or cerebral tissues alter cerebral blood flow in the manner required to maintain homeostasis with respect to cerebral tissue  $P_{rO_2}$ . Since carbon dioxide is a product of cerebral metabolism, it is, in effect, the chemical mediator of the mechanism postulated by Roy and Sherrington<sup>50</sup> 70 years ago, which adjusts the blood flow of the cerebral tissues to their metabolic rate.

Its role is particularly magnified by the apparent absence of any significant degree of nervous control of the cerebral circulation. This aspect is most obvious in the many unique features of the pharmacology of the cerebral circulation.<sup>61</sup> Drugs which exert powerful effects on other vascular beds through neurogenic mechanisms frequently have either no effects or entirely independent actions on the cerebral vessels as a result of their side effects on the  $CO_2$  tension of the blood. Indeed the nature of the effect of  $CO_2$ , itself, on the cerebral circulation is quite distinct from its action on most other vascular beds. The relationship between  $CO_2$  and the cerebral circulation is so intimate and so fundamental that no physiological or pharmacological study of the circulation of the brain can be considered complete without the simultaneous examination of the effects of the experimental conditions on the state of  $CO_2$  in the blood and cerebral tissues.

# REFERENCES

1. Britton, S. W., Corey, E. L., and Stewart, G. A.: Effects of high acceleratory forces and their alleviation, *Amer. J. Physiol.* **146**: 33, 1946.
2. Britton, S. W., Pertzoff, V. A., French, C. R., and Kline, R. F.: Circulatory and cerebral changes and protective aids during exposure to acceleratory forces, *Amer. J. Physiol.* **150**: 7, 1947.
3. Bronk, D. W., and Gesell, R.: Regulation of respiration; effects of carbon dioxide, sodium bicarbonate and sodium carbonate on carotid and femoral flow of blood, *Amer. J. Physiol.* **82**: 170, 1927.
4. Cobb, S., and Fremont-Smith, F.: Cerebral circulation; Changes in human retinal circulation and in pressure of cerebrospinal fluid during inhalation of mixture of carbon dioxide and oxygen, *Arch. Neurol. Psychiat.*, **26**: 731, 1931.
5. Courtice, F. C.: Gaseous tensions in brain, *J. Physiol.* **100**: 192, 1941.
6. Courtice, F. C.: Effect of oxygen lack on cerebral circulation, *J. Physiol.* **100**: 198, 1941.
7. Cow, D.: Some reactions of surviving arteries, *J. Physiol.* **42**: 125, 1911.
8. Davies, P. W., Grenell, R. G., and Bronk, D. W.: Time course of *in vivo* oxygen consumption of cerebral cortex following electrical stimulation, *Fed. Proc.* **7**: 25, 1948.
9. Davies, P. W., and Remond, A.: Oxygen consumption of cerebral cortex of cat during metrazole convulsions, *Res. Publ. Ass. Nerv. Ment. Dis.* **26**: 205, 1946.
10. Davis, E. W., McCulloch, W. S., and Roseman, E.: Rapid changes in oxygen tension of cerebral cortex during induced convulsions, *Amer. J. Psychiat.* **100**: 825, 1944.
11. Dripps, B. D., and Comroe, J. H., Jr.: Respiratory and circulatory response of normal men to inhalation of 7.6 and 10.4 per cent  $CO_2$  with comparison of maximal ventilation produced by severe muscular exercise, inhalation of  $CO_2$ , and maximal voluntary hyperventilation, *Amer. J. Physiol.* **149**: 43, 1947.
12. Eckenhoff, J. E., Hafkenschiel, J. H., and Landmesser, C. M.: Coronary circulation in dog, *Amer. J. Physiol.* **148**: 582, 1947.
13. Fazekas, J. F., Alman, R. W., and Bessman, A. N.: Cerebral physiology of aged, *Amer. J. Med. Sci.* **223**: 245, 1952.
14. Fazekas, J. F., Bessman, A. N., Cotsonas, N. J., Jr., and Alman, R. W.: Cerebral hemodynamics in cerebral arteriosclerosis, *J. Geront.* **8**: 137, 1953.
15. Finnerty, F. A., Jr., Witkin, L., and Fazekas, J. F.: Cerebral hemodynamics during cerebral ischemia induced by acute hypotension, *J. Clin. Invest.* **33**: 1227, 1954.
16. Forbes, H. S.: Physiological regulation of cerebral circulation, *Arch. Neurol. Psychiat.*, **43**: 804, 1940.
17. Freygang, W. H., and Sokoloff, L.: Quantitative measurements of regional circulation in central nervous system by use of radioactive inert gas, in *Advances in Biological and*

- Medical Physics, vol. 6. New York, Academic Press, Inc., 1958, p. 263.
18. Geiger, A., and Magyes, J.: Isolation of cerebral circulation and perfusion of brain in living cat, *Amer. J. Physiol.* **149**: 517, 1947.
  19. Gibbs, E. L., Gibbs, F. A., Lennox, W. G., and Nims, L. F.: Regulation of cerebral carbon dioxide, *Arch. Neurol. Psychiat.* **47**: 879, 1942.
  20. Gibbs, F. A., Gibbs, E. L., Lennox, W. G., and Nims, L. F.: Value of carbon dioxide in counteracting the effects of low oxygen, *J. Aviat. Med.* **14**: 250, 1943.
  21. Gibbs, F. A., Maxwell, H., and Gibbs, E. L.: Volume flow of blood through human brain, *Arch. Neurol. Psychiat.* **57**: 137, 1947.
  22. Goodman, L. S., and Gilman, A.: *The Pharmacological Basis of Therapeutics*, ed. 2. New York, Macmillan Company, 1955.
  23. Hafkenschiel, J. H., and Friedland, C. K.: Physiology of cerebral circulation in essential hypertension: effects of inhalation of 5 per cent carbon dioxide-oxygen mixtures on cerebral hemodynamics and oxygen metabolism, *J. Pharmacol.* **106**: 391, 1952.
  24. Hansen, D. B., Sultz, M. R., Freygang, W. H., and Sokoloff, L.: Effects of low  $O_2$  and high  $CO_2$  concentrations in inspired air on local cerebral circulation, *Fed. Proc.* **16**: 54, 1957.
  25. Heyman, A., Patterson, J. L., Duke, T. W., and Battey, L. L.: Cerebral circulation and metabolism in arteriosclerotic and hypertensive cerebrovascular disease, *New Engl. J. Med.* **249**: 223, 1953.
  26. Himwich, H., Fazekas, J., Herlich, H., Johnson, A. E., and Baruch, A. L.: Studies on effects of adding carbon dioxide to oxygen-enriched atmospheres in low pressure chambers: oxygen and carbon dioxide tensions of cerebral blood, *J. Aviat. Med.* **13**: 177, 1942.
  27. Himwich, W. A., Homburger, E., Maresca, R., and Himwich, H. E.: Brain metabolism in man: unanesthetized and in pentothal narcosis, *Amer. J. Psychiat.* **103**: 689, 1947.
  28. Irving, L.: Changes in blood flow through the brain and muscles during arrest of breathing, *Amer. J. Physiol.* **122**: 207, 1938.
  29. Irving, L., and Welch, M. S.: Effect of composition of inspired air on circulation through brain, *Quart. J. Exp. Physiol.* **25**: 121, 1935.
  30. Kety, S. S.: Quantitative determination of cerebral blood flow in man, in *Methods in Medical Research*, vol. 1. Chicago, Year Book Publishers, 1948, p. 204.
  31. Kety, S. S.: Circulation and metabolism of human brain in health and disease, *Amer. J. Med.* **8**: 205, 1950.
  32. Kety, S. S.: Blood-tissue exchange methods. Theory of blood-tissue exchange and its application to measurement of blood flow, in *Methods in Medical Research*, vol. 8. Chicago, Year Book Publishers, 1960, p. 223.
  33. Kety, S. S., Polis, B. D., Nadler, C. S., and Schmidt, C. F.: Blood flow and oxygen consumption of human brain in diabetic acidosis and coma, *J. Clin. Invest.* **27**: 500, 1948.
  34. Kety, S. S., and Schmidt, C. F.: Effects of active and passive hyperventilation on cerebral blood flow, cerebral oxygen consumption, cardiac output, and blood pressure of normal young men, *J. Clin. Invest.* **25**: 107, 1946.
  35. Kety, S. S., and Schmidt, C. F.: Nitrous oxide method for quantitative determination of cerebral blood flow in man: theory, procedure, and normal values, *J. Clin. Invest.* **27**: 476, 1948.
  36. Kety, S. S., and Schmidt, C. F.: Effects of altered arterial tensions of carbon dioxide and oxygen on cerebral blood flow and cerebral oxygen consumption of normal young men, *J. Clin. Invest.* **27**: 484, 1948.
  37. Lamberton, C. J., Kough, R. H., Cooper, D. Y., Emmel, G. L., Loeschke, H. H., and Schmidt, C. F.: Oxygen toxicity. Effects in man of oxygen inhalation at 1 to 3.5 atmospheres upon blood gas transport, cerebral circulation and cerebral metabolism, *J. Appl. Physiol.* **5**: 471, 1953.
  38. Landau, W. M., Freygang, W. H., Rowland, L. P., Sokoloff, L., and Kety, S. S.: Local circulation of living brain: values in unanesthetized and anesthetized cat, *Trans. Amer. Neurol. Assoc.* **80**: 125, 1955.
  39. Lassen, N. A.: Cerebral blood flow and oxygen consumption in man, *Physiol. Rev.* **39**: 183, 1959.
  40. Lassen, N. A., and Munck, O.: Cerebral blood flow in man determined by use of radioactive krypton, *Acta Physiol. Scand.* **33**: 30, 1955.
  41. Lassen, N. A., Munck, O., and Totter, E. R.: Mental function and cerebral oxygen consumption in organic dementia, *A. M. A. Arch. Neurol.* **77**: 126, 1957.
  42. Lennox, W. G., and Gibbs, E. L.: Blood flow in brain and leg of man and changes induced by alteration of blood gases, *J. Clin. Invest.* **11**: 1155, 1932.
  43. Lennox, W. G., Gibbs, F. A., and Gibbs, E. L.: Relationship in man of cerebral activity to blood flow and to blood constituents, *Res. Publ. Ass. Nerv. Ment. Dis.* **18**: 174, 1938.
  44. Lewis, B. M., Sokoloff, L., Wechsler, R. L., Wentz, W. B., and Kety, S. S.: Method for continuous measurement of cerebral blood flow in man by means of radioactive krypton ( $Kr^{79}$ ), *J. Clin. Invest.* **39**: 707, 1960.
  45. Lubin, A. J., and Price, J. C.: Effect of alkalosis and acidosis on cortical electrical activity and blood flow, *J. Neurophysiol.* **5**: 261, 1943.
  46. Noell, W., and Schneider, M.: Über die Durchblutung und die Sauerstoffversorgung des Gehirns. Die Rolle der Kohlensäure, *Pflüg Arch. ges. Physiol.* **247**: 514, 1944.

7. Novack, P., Shenkin, H. A., Bortin, L., Goluboff, B., and Solfe, A. M.: Effects of carbon dioxide inhalation upon cerebral blood flow and cerebral oxygen consumption in vascular disease, *J. Clin. Invest.* 32: 696, 1953.
8. Patterson, J. L., Heyman, A., Battey, L. L., and Ferguson, R. W.: Threshold of response of cerebral vessels of man to increase in blood carbon dioxide, *J. Clin. Invest.* 34: 1857, 1955.
9. Patterson, J. L., Waites, E. J., and McPhaul, M. V.: Differential circulatory effects of carbon dioxide, Cited by Patterson *et al.*<sup>48</sup>
10. Roy, C. S., and Sherrington, C. S.: On regulation of blood supply of brain, *J. Physiol.* 11: 85, 1890.
11. Ryder, H. W., Espey, F. F., Kristoff, F. V., and Evans, J. P.: Measurement of instantaneous changes in cerebral blood flow in human beings by its effect on cerebrospinal fluid pressure, *J. Lab. Clin. Med.* 36: 982, 1950.
12. Ryder, H. W., Espey, F. F., Kristoff, F. V., and Evans, J. P.: Observations on interrelationships of intracranial pressure and cerebral blood flow, *J. Neurosurg.* 8: 46, 1951.
13. Scheinberg, P., Blackburn, I., Rich, M., and Saslaw, M.: Effects of aging on cerebral circulation and metabolism, *A. M. A. Arch. Neurol.* 70: 77, 1953.
14. Scheinberg, P., and Stead, E. A., Jr.: Cerebral blood flow in male subjects as measured by nitrous oxide technique. Normal values for blood flow, oxygen utilization, glucose utilization, and peripheral resistance, with observations on effect of tilting and anxiety, *J. Clin. Invest.* 28: 1163, 1949.
15. Schieve, J. F., and Wilson, W. P.: Changes in cerebral vascular resistance of man in experimental alkalosis and acidosis, *J. Clin. Invest.* 32: 33, 1953.
16. Schieve, J. F., and Wilson, W. P.: Influence of age, anesthesia and cerebral arteriosclerosis on cerebral vascular activity to carbon dioxide, *Amer. J. Med.* 15: 171, 1953.
17. Schmidt, C. F.: *The Cerebral Circulation in Health and Disease*. Springfield, Illinois, Charles C Thomas, Publisher, 1950.
18. Schmidt, C. F., and Hendrix, J. P.: Action of Chemical substances on cerebral blood vessels, *Res. Publ. Ass. Nerv. Ment. Dis.* 18: 229, 1937.
19. Schmidt, C. F., Kety, S. S., and Pennes, H. H.: Gaseous metabolism of brain of monkey, *Amer. J. Physiol.* 143: 33, 1945.
20. Sohler, T. P., Lothrop, G. N., and Forbes, H. S.: The pial circulation of normal, non-anesthetized animals. II. The effects of drugs, alcohol, and CO<sub>2</sub>, *J. Pharmacol.* 71: 331, 1941.
21. Sokoloff, L.: Action of drugs on cerebral circulation, *Pharmacol. Rev.* 11: 1, 1959.
22. Sokoloff, L., and Kety, S. S.: Regulation of cerebral circulation, *Physiol. Rev.* 40(suppl. 4): 38, 1960.
23. Steck, I. E., and Gellhorn, E.: Effect of carbon dioxide inhalation on peripheral blood flow in normal and in sympathectomized patient, *Amer. Heart J.*, 18: 206, 1939.
24. Stone, H. H., MacKrell, T. N., Brandstater, B. J., Haidak, G. L., and Nemir, P.: Effect of induced hemorrhagic shock on cerebral circulation and metabolism of man, *Surg. Forum* 5: 789, 1955.
25. Turner, J., Lambertsen, C. J., Owen, S. G., Wendel, H., and Chiodi, H.: Effects of .08 and .8 atmospheres of inspired pO<sub>2</sub> upon cerebral hemodynamics at a "constant" alveolar pCO<sub>2</sub> of 43 mm. Hg, *Fed. Proc.* 16: 130, 1957.
26. Van Middlesworth, L., and Kline, R. F.: Protection against acceleratory forces by carbon dioxide inhalation, *Amer. J. Physiol.* 152: 22, 1948.
27. Wechsler, R. L., Dripps, R. D., and Kety, S. S.: Blood flow and oxygen consumption of human brain during anesthesia produced by thiopental, *ANESTHESIOLOGY* 12: 308, 1951.
28. White, J. C., Verlot, M., Silverstone, B., and Beecher, H. K.: Changes in brain volume during anesthesia. Effects of anoxia and hypercapnia, *Arch. Surg.* 44: 1, 1942.
29. Wilson, W. P., Odum, G. L., and Schieve, J. F.: Effect of carbon dioxide on cerebral blood flow, spinal fluid pressure, and brain volume during Pentothal sodium anesthesia, *Anesth. & Analg.* 32: 268, 1953.
30. Wolff, H. G.: Cerebral circulation, *Physiol. Rev.* 16: 545, 1936.
31. Wolff, H. G., and Lennox, W. G.: Cerebral circulation: effect on pial vessels of variations in the O<sub>2</sub> and CO<sub>2</sub> content of blood, *Arch. Neurol. Psychiat.* 23: 1097, 1950.
